# Supplementary material for: The AO Pediatric Comprehensive Classification of Long Bone Fractures (PCCF): Part I: Location and morphology of 2,292 upper extremity fractures in children and adolescents
Source: PubMed Central journal article supplement — Acta Orthop. 2016 Nov 24;88(2):123–8. doi: 10.1080/17453674.2016.1258532 (PMC5385104; doi:10.1080/17453674.2016.1258532), 2016-11-24
Supplement: IORT_A_1258532_SM3083.pdf [file IORT_A_1258532_SM3083.pdf]

## Supplementary data

Table 3. Combined fractures in the forearm with 1 fracture location in the radius and 1 fracture location in the ulna

| Radius                     | Ulna  |       |       |       |       | Total      |
|----------------------------|-------|-------|-------|-------|-------|------------|
|                            | 21u-E | 21u-M | 22u-D | 23u-M | 23u-E |            |
| <b>Infants/toddlers</b>    |       |       |       |       |       |            |
| 21r-E                      | –     | –     | –     | –     | –     | –          |
| 21r-M                      | –     | 1     | –     | –     | –     | –          |
| 22r-D                      | –     | –     | 10    | –     | –     | –          |
| 23r-M                      | –     | –     | –     | 24    | –     | –          |
| 23r-E                      | –     | –     | –     | –     | –     | –          |
|                            |       |       |       |       |       | 35         |
| <b>Pre-school children</b> |       |       |       |       |       |            |
| 21r-E                      | –     | 1     | –     | –     | –     | –          |
| 21r-M                      | –     | 9     | 2     | –     | –     | –          |
| 22r-D                      | –     | –     | 70    | 9     | –     | –          |
| 23r-M                      | –     | –     | 4     | 99    | 1     | –          |
| 23r-E                      | –     | –     | –     | 6     | 1     | –          |
|                            |       |       |       |       |       | 202        |
| <b>Schoolchildren</b>      |       |       |       |       |       |            |
| 21r-E                      | –     | 3     | –     | –     | –     | –          |
| 21r-M                      | –     | 3     | 1     | –     | –     | –          |
| 22r-D                      | –     | 1     | 58    | 4     | –     | –          |
| 23r-M                      | –     | 1     | 2     | 153   | 23    | –          |
| 23r-E                      | –     | –     | –     | 11    | 12    | –          |
|                            |       |       |       |       |       | 272        |
| <b>Adolescents</b>         |       |       |       |       |       |            |
| 21r-E                      | –     | –     | –     | –     | –     | –          |
| 21r-M                      | –     | –     | –     | –     | –     | –          |
| 22r-D                      | –     | –     | 26    | 4     | –     | –          |
| 23r-M                      | –     | –     | 1     | 67    | 65    | –          |
| 23r-E                      | –     | –     | –     | 3     | 51    | –          |
|                            |       |       |       |       |       | 217        |
| <b>Total</b>               |       |       |       |       |       | <b>726</b> |

D: diaphysis; E: epiphysis; M: metaphysis; r: radius; u: ulna.

Table 4. Distribution of child-specific fracture patterns in epiphyseal fractures of the upper extremity for each age class

| Bone                 | Sub-segment | Code      | Morphology – fracture pattern |             |              |             |                        |             | Total |             |
|----------------------|-------------|-----------|-------------------------------|-------------|--------------|-------------|------------------------|-------------|-------|-------------|
|                      |             |           | /1<br>SH I                    | /2<br>SH II | /3<br>SH III | /4<br>SH IV | /7<br>Lig.<br>avulsion | /8<br>Flake |       | /9<br>Other |
| Infants and toddlers |             |           |                               |             |              |             |                        |             |       |             |
| Humerus              | Distal      | 13-E      | –                             | –           | 1            | –           | –                      | –           | –     | 1           |
| Pre-school children  |             |           |                               |             |              |             |                        |             |       |             |
| Humerus              | Proximal    | 11-E      | –                             | 3           | –            | –           | n.a.                   | –           | –     | 3           |
|                      | Distal      | 13-E      | –                             | –           | 5            | 36          | 1                      | –           | –     | 42          |
| Radius               | Proximal    | 21r-E     | –                             | 2           | –            | –           | n.a.                   | n.a.        | –     | 2           |
|                      | Distal      | 23r-E     | –                             | 1           | –            | –           | n.a.                   | n.a.        | –     | 1           |
| Ulna                 | Distal      | 23u-E     | –                             | –           | –            | –           | –                      | n.a.        | –     | 0           |
|                      |             | Total (%) | 0 (0)                         | 6 (13)      | 5 (10)       | 36 (75)     | 1 (2)                  | 0 (0)       | 0 (0) | 48 (100)    |
| Schoolchildren       |             |           |                               |             |              |             |                        |             |       |             |
| Humerus              | Proximal    | 11-E      | 1                             | 6           | –            | –           | n.a.                   | –           | –     | 7           |
|                      | Distal      | 13-E      | –                             | –           | 2            | 21          | 5                      | –           | 1     | 29          |
| Radius               | Proximal    | 21r-E     | –                             | 9           | 2            | –           | n.a.                   | n.a.        | –     | 11          |
|                      | Distal      | 23r-E     | 2                             | 31          | –            | –           | n.a.                   | n.a.        | –     | 33          |
| Ulna                 | Distal      | 23u-E     | –                             | –           | –            | –           | –                      | n.a.        | –     | 0           |
|                      |             | Total (%) | 3 (4)                         | 46 (58)     | 4 (5)        | 21 (26)     | 5 (6)                  | 0 (0)       | 1 (1) | 80 (100)    |
| Adolescents          |             |           |                               |             |              |             |                        |             |       |             |
| Humerus              | Proximal    | 11-E      | 4                             | 14          | –            | –           | n.a.                   | –           | –     | 18          |
|                      | Distal      | 13-E      | 1                             | –           | 2            | 9           | 2                      | 4           | 3     | 21          |
| Radius               | Proximal    | 21r-E     | 1                             | 3           | –            | –           | n.a.                   | n.a.        | –     | 4           |
|                      | Distal      | 23r-E     | 9                             | 39          | 1            | –           | n.a.                   | n.a.        | 1     | 50          |
| Ulna                 | Distal      | 23u-E     | –                             | –           | –            | –           | 1                      | n.a.        | –     | 1           |
|                      |             | Total (%) | 15 (16)                       | 56 (60)     | 3 (3)        | 9 (10)      | 3 (3)                  | 4 (4)       | 4 (4) | 94 (100)    |
| Total (%)            |             |           | 18 (8)                        | 108 (49)    | 13 (6)       | 66 (30)     | 9 (4)                  | 4 (2)       | 5 (2) | 222 (100)   |

E: epiphysis; n.a.: not applicable; r: radius; SH: Salter-Harris; u: ulna.

Table 5. Distribution of child-specific fracture patterns in metaphyseal fractures of the upper extremity for each age class

| Bone                 | Sub-segment | Code      | Morphology – fracture pattern |                |                              |                     |             | Total       |
|----------------------|-------------|-----------|-------------------------------|----------------|------------------------------|---------------------|-------------|-------------|
|                      |             |           | /2<br>Incomplete <sup>a</sup> | /3<br>Complete | /6<br>Monteggia <sup>b</sup> | /7<br>Lig. avulsion | /9<br>Other |             |
| Infants and toddlers |             |           |                               |                |                              |                     |             |             |
| Humerus              | Proximal    | 11-M      | 1                             | 1              | n.a.                         | n.a.                | –           | 2           |
|                      | Distal      | 13-M      | n.a.                          | 18             | n.a.                         | –                   | 1           | 19          |
| Radius               | Proximal    | 21r-M     | 1                             | –              | n.a.                         | n.a.                | –           | 1           |
|                      | Distal      | 23r-M     | 31                            | 1              | n.a.                         | n.a.                | –           | 32          |
| Ulna                 | Proximal    | 21u-M     | 1                             | –              | –                            | –                   | –           | 1           |
|                      | Distal      | 23u-M     | 3                             | –              | n.a.                         | n.a.                | –           | 3           |
|                      |             | Total (%) | 38 (66)                       | 20 (34)        | 0 (0)                        | 0 (0)               | 1 (0)       | 58 (100)    |
| Pre-school children  |             |           |                               |                |                              |                     |             |             |
| Humerus              | Proximal    | 11-M      | 7                             | 7              | n.a.                         | n.a.                | –           | 14          |
|                      | Distal      | 13-M      | n.a.                          | 154            | n.a.                         | –                   | 1           | 155         |
| Radius               | Proximal    | 21r-M     | 1                             | –              | n.a.                         | n.a.                | –           | 1           |
|                      | Distal      | 23r-M     | 105                           | 1              | n.a.                         | n.a.                | –           | 106         |
| Ulna                 | Proximal    | 21u-M     | 13                            | 2              | 8                            | –                   | –           | 23          |
|                      | Distal      | 23u-M     | –                             | –              | n.a.                         | n.a.                | –           | 0           |
|                      |             | Total (%) | 126 (42)                      | 164 (55)       | 8 (3)                        | 0 (0)               | 1 (0*)      | 299 (100)   |
| Schoolchildren       |             |           |                               |                |                              |                     |             |             |
| Humerus              | Proximal    | 11-M      | 14                            | 17             | n.a.                         | n.a.                | –           | 31          |
|                      | Distal      | 13-M      | n.a.                          | 147            | n.a.                         | 14                  | 2           | 163         |
| Radius               | Proximal    | 21r-M     | 8                             | 12             | n.a.                         | n.a.                | –           | 20          |
|                      | Distal      | 23r-M     | 316                           | 29             | n.a.                         | n.a.                | –           | 345         |
| Ulna                 | Proximal    | 21u-M     | 6                             | 1              | 1                            | –                   | –           | 8           |
|                      | Distal      | 23u-M     | 3                             | 1              | n.a.                         | n.a.                | –           | 4           |
|                      |             | Total (%) | 347 (61)                      | 207 (36)       | 1 (0 <sup>c</sup> )          | 14 (3)              | 2 (0*)      | 571 (100)   |
| Adolescents          |             |           |                               |                |                              |                     |             |             |
| Humerus              | Proximal    | 11-M      | 8                             | 21             | n.a.                         | n.a.                | –           | 29          |
|                      | Distal      | 13-M      | n.a.                          | 13             | n.a.                         | 7                   | 1           | 21          |
| Radius               | Proximal    | 21r-M     | 5                             | 6              | n.a.                         | n.a.                | –           | 11          |
|                      | Distal      | 23r-M     | 174                           | 19             | n.a.                         | n.a.                | 1           | 194         |
| Ulna                 | Proximal    | 21u-M     | 2                             | 7              | 1                            | 1                   | 2           | 13          |
|                      | Distal      | 23u-M     | 3                             | 1              | n.a.                         | n.a.                | –           | 4           |
|                      |             | Total (%) | 192 (71)                      | 67 (25)        | 1 (0 <sup>c</sup> )          | 8 (3)               | 4 (1)       | 272 (100)   |
| Total (%)            |             |           | 702 (58)                      | 458 (38)       | 10 (1)                       | 22 (2)              | 8 (1)       | 1,200 (100) |

M: metaphysis; n.a.: not applicable; r: radius; u: ulna.  
<sup>a</sup> Torus/buckle, or greenstick.  
<sup>b</sup> Monteggia lesion with metaphyseal fracture of the ulna.  
<sup>c</sup> < 0.5%.

Table 6. Distribution of child-specific fracture patterns in diaphyseal fractures of the upper extremity for each age class

| Bone                 | Code      | Morphology - fracture pattern |         |                                       |                                            |                 |                |             | Total    |
|----------------------|-----------|-------------------------------|---------|---------------------------------------|--------------------------------------------|-----------------|----------------|-------------|----------|
|                      |           | /1                            | /2      | /4<br>Complete<br>transverse<br>< 30° | /5<br>Complete<br>oblique/<br>spiral > 30° | /6<br>Monteggia | /7<br>Galeazzi | /9<br>Other |          |
| Infants and toddlers |           |                               |         |                                       |                                            |                 |                |             |          |
| Humerus              | 12-D      | n.a.                          | n.a.    | –                                     | 2                                          | n.a.            | n.a.           | –           | 2        |
| Radius               | 22r-D     | –                             | 1       | –                                     | –                                          | n.a.            | –              | –           | 1        |
| Ulna                 | 22u-D     | –                             | –       | –                                     | –                                          | –               | n.a.           | –           | 0        |
|                      | Total (%) | 0 (0)                         | 1 (33)  | 0 (0)                                 | 2 (67)                                     | 0 (0)           | 0 (0)          | 0 (0)       | 3 (100)  |
| Pre-school children  |           |                               |         |                                       |                                            |                 |                |             |          |
| Humerus              | 12-D      | n.a.                          | n.a.    | 2                                     | 6                                          | n.a.            | n.a.           | 1           | 9        |
| Radius               | 22r-D     | 5                             | 5       | –                                     | –                                          | n.a.            | –              | –           | 10       |
| Ulna                 | 22u-D     | 2                             | 3       | 1                                     | 1                                          | 8               | n.a.           | 1           | 16       |
|                      | Total (%) | 7 (20)                        | 8 (23)  | 3 (9)                                 | 7 (20)                                     | 8 (23)          | 0 (0)          | 2 (6)       | 35 (100) |
| Schoolchildren       |           |                               |         |                                       |                                            |                 |                |             |          |
| Humerus              | 12-D      | n.a.                          | n.a.    | 2                                     | 2                                          | n.a.            | n.a.           | –           | 4        |
| Radius               | 22r-D     | 5                             | 8       | 1                                     | –                                          | n.a.            | –              | –           | 14       |
| Ulna                 | 22u-D     | 3                             | 5       | –                                     | 2                                          | 7               | n.a.           | –           | 17       |
|                      | Total (%) | 8 (23)                        | 13 (37) | 3 (9)                                 | 4 (11)                                     | 7 (20)          | 0 (0)          | 0 (0)       | 35 (100) |
| Adolescents          |           |                               |         |                                       |                                            |                 |                |             |          |
| Humerus              | 12-D      | n.a.                          | n.a.    | 8                                     | 3                                          | n.a.            | n.a.           | –           | 11       |
| Radius               | 22r-D     | –                             | 6       | –                                     | 1                                          | n.a.            | –              | –           | 7        |
| Ulna                 | 22u-D     | –                             | 3       | –                                     | 1                                          | 1               | n.a.           | –           | 5        |
|                      | Total (%) | 0 (0)                         | 9 (39)  | 8 (35)                                | 5 (22)                                     | 1 (4)           | 0 (0)          | 0 (0)       | 23 (100) |
|                      | Total (%) | 15 (16)                       | 31 (32) | 14 (15)                               | 18 (19)                                    | 16 (17)         | 0 (0)          | 2 (2)       | 96 (100) |

D: diaphysis; n.a.: not applicable; r: radius; u: ulna.

Table 7. Distribution of child-specific combined fracture patterns of the radius and ulna. Values are n (%)<sup>a</sup>

| Radius                |                         | Ulna                          |                  |                              |                  |                              | Total       |
|-----------------------|-------------------------|-------------------------------|------------------|------------------------------|------------------|------------------------------|-------------|
| Proximal, metaphyseal |                         | /2<br>Incomplete <sup>b</sup> | /3<br>Complete   | /6<br>Monteggia <sup>c</sup> |                  |                              | /9<br>Other |
| /2                    | Incomplete <sup>b</sup> | –                             | 3 (23)           | 6 (46)                       | 1                | 1                            | –           |
| /3                    | Complete                | –                             | –                | 2                            | –                | –                            | –           |
| /6                    | Monteggia <sup>c</sup>  | –                             | –                | –                            | –                | –                            | –           |
| /9                    | Other                   | –                             | –                | –                            | –                | –                            | –           |
|                       |                         |                               |                  |                              |                  |                              | 13 (100)    |
| Diaphyseal            |                         | /1<br>Bowling                 | /2<br>Greenstick | /4<br>CT < 30°               | /5<br>CO/S > 30° | /6<br>Monteggia <sup>c</sup> |             |
| /1                    | Bowling                 | 2                             | 8                | –                            | 5                | 1                            | –           |
| /2                    | Greenstick              | 10                            | 54 (33)          | 6                            | 6                | –                            | –           |
| /4                    | CT < 30°                | 1                             | 13               | 19                           | 24               | –                            | –           |
| /5                    | CO/S > 30°              | 3                             | 3                | 1                            | 8                | –                            | –           |
| /6                    | Monteggia <sup>c</sup>  | –                             | –                | –                            | –                | –                            | –           |
|                       |                         |                               |                  |                              |                  |                              | 164 (100)   |
| Distal, metaphyseal   |                         | /2<br>Incomplete <sup>b</sup> |                  | /3<br>Complete               |                  |                              |             |
| /2                    | Incomplete <sup>b</sup> | 218 (63)                      |                  | 2                            |                  |                              | –           |
| /3                    | Complete                | 67                            |                  | 58                           |                  |                              | –           |
|                       |                         |                               |                  |                              |                  |                              | 345 (100)   |
| Distal, epiphyseal    |                         | /1<br>SH I                    | /2<br>SH II      | /3<br>SH III                 | /4<br>SH IV      | /7<br>Lig. avulsion          |             |
| /1                    | SH I                    | 1                             | –                | –                            | –                | 5                            | –           |
| /2                    | SH II                   | –                             | 12               | 1                            | –                | 44 (69)                      | –           |
| /3                    | SH III                  | –                             | –                | –                            | –                | –                            | –           |
| /4                    | SH IV                   | –                             | –                | –                            | –                | 1                            | –           |
| /7                    | Lig. avulsion           | –                             | –                | –                            | –                | –                            | –           |
|                       |                         |                               |                  |                              |                  |                              | 64 (100)    |

CO/S: complete oblique/spiral; CT: complete transverse; SH: Salter-Harris.

<sup>a</sup> Percentages are only provided if they were greater than 20%.

<sup>b</sup> Torus/buckle, or greenstick.

<sup>c</sup> Monteggia lesion with metaphyseal fracture of the ulna.
